# Supplementary material for: Diagnostic Accuracy and Reliability of Noncontrast Computed Tomography Markers for Acute Hematoma Expansion among Radiologists
Source: MDPI journal article supplement (doi:10.3390/tomography8060242), 2022-12-09
Supplement: s1 [file s1]

## *Supplementary Material*

Table S1: Definitions for Noncontrast Computed Tomography Markers

| NCCT marker     | Definition                                                                                                                                                                                                                                                                                          |
|-----------------|-----------------------------------------------------------------------------------------------------------------------------------------------------------------------------------------------------------------------------------------------------------------------------------------------------|
| IRR shape       | IRR shape was defined as foci of hematoma margin irregularities in the largest hematoma region according to the Barras shape scale I-V. The presence of IRR shape was defined after dichotomization with a Barras scale of $\geq$ III.                                                              |
| Satellite sign  | Satellite sign was defined as a hematoma separate from the main hematoma (1-20 mm distance) with a maximum diameter of 10 mm.                                                                                                                                                                       |
| Island sign     | The island sign consisted of at least three scattered small hematomas all separate from the main hematoma or at least four small hematomas some or all of which may connect with the main hematoma.                                                                                                 |
| HET density     | HET density was evaluated as foci of hypoattenuation within the largest hematoma compared to the brain parenchyma according to the Barras density scale I-V. The presence of HET density was defined after dichotomization with a Barras scale of $\geq$ III.                                       |
| Swirl sign      | The swirl sign was defined as a region of hypo- or isoattenuation compared with the brain parenchyma. The region may be rounded, streak-like or irregular and does not require a strict encapsulation within the hematoma.                                                                          |
| Black hole sign | The black hole sign consisted of a relatively hypodense area which is encapsulated within a hyperdense area and which is not connected with the adjacent brain tissue. The relatively hypodense area has an identifiable border and a difference of at least 28 HU between the two density regions. |
| Blend sign      | Blend sign was defined as a hypoattenuating area adjacent to a hyperattenuating area of the hematoma, with a clear separation between them at a density difference of at least 18 Hounsfield Units (HU).                                                                                            |
| Fluid sign      | Fluid sign referred similarly to the presence of one distinct hypoattenuating area above and one hyperattenuating area below a discrete straight line of separation, yet irrespective of its density measurements.                                                                                  |
| Hypodensities   | The imaging sign hypodensities was defined as any hypodense region strictly encapsulated within the hemorrhage with any shape, size, and density which does not require a density measurement.                                                                                                      |

Legend: Definitions on Noncontrast Computed Tomography markers in patients with acute spontaneous intracerebral hemorrhage. HET density indicated heterogeneous density; IRR shape, irregular shape; NCCT, noncontrast Computed Tomography.

Table S2: Receiver operative characteristic analysis for Noncontrast Computed Tomography Markers in the prognosis of acute hematoma expansion between different raters.

|                           |              |              |           |                 |
|---------------------------|--------------|--------------|-----------|-----------------|
| <b>IRR Shape</b>          | <b>AUC</b>   | <b>95%CI</b> | <b>SE</b> |                 |
| Neuroradiology Fellow     | 0.585        | 0.548-0.621  | 0.018     |                 |
| Resident                  | 0.589        | 0.549-0.622  | 0.018     |                 |
| Radiology Fellow          | 0.586        | 0.552-0.625  | 0.018     |                 |
| <b>AUC comparison</b>     | <b>Δ AUC</b> | <b>95%CI</b> | <b>SE</b> | <b>P-value*</b> |
| Neuro Fellow ~ Resident   | 0.004        | -0.012-0.02  | 0.008     | 0.616           |
| Resident ~ Rad Fellow     | 0.003        | -0.013-0.02  | 0.009     | 0.701           |
| Neuro Fellow ~ Rad Fellow | 0.001        | -0.01-0.012  | 0.005     | 0.894           |

  

|                           |              |               |           |                 |
|---------------------------|--------------|---------------|-----------|-----------------|
| <b>Satellite Sign</b>     | <b>AUC</b>   | <b>95%CI</b>  | <b>SE</b> |                 |
| Neuroradiology Fellow     | 0.528        | 0.492-0.565   | 0.019     |                 |
| Resident                  | 0.521        | 0.485-0.558   | 0.019     |                 |
| Radiology Fellow          | 0.521        | 0.484-0.558   | 0.013     |                 |
| <b>AUC comparison</b>     | <b>Δ AUC</b> | <b>95%CI</b>  | <b>SE</b> | <b>P-value*</b> |
| Neuro Fellow ~ Resident   | 0.007        | -0.007-0.021  | 0.007     | 0.336           |
| Resident ~ Rad Fellow     | 0.000        | -0.037-0.0370 | 0.012     | 0.994           |
| Neuro Fellow ~ Rad Fellow | 0.007        | -0.029-0.044  | 0.019     | 0.707           |

  

|                           |              |              |           |                 |
|---------------------------|--------------|--------------|-----------|-----------------|
| <b>Island Sign</b>        | <b>AUC</b>   | <b>95%CI</b> | <b>SE</b> |                 |
| Neuroradiology Fellow     | 0.566        | 0.507-0.581  | 0.019     |                 |
| Resident                  | 0.530        | 0.493-0.566  | 0.019     |                 |
| Radiology Fellow          | 0.523        | 0.472-0.573  | 0.009     |                 |
| <b>AUC comparison</b>     | <b>Δ AUC</b> | <b>95%CI</b> | <b>SE</b> | <b>P-value*</b> |
| Neuro Fellow ~ Resident   | 0.014        | 0.00-0.028   | 0.007     | 0.434           |
| Resident ~ Rad Fellow     | 0.028        | -0.011-0.068 | 0.02      | 0.158           |
| Neuro Fellow ~ Rad Fellow | 0.043        | 0.003-0.082  | 0.012     | 0.037           |

  

|                           |              |              |           |                 |
|---------------------------|--------------|--------------|-----------|-----------------|
| <b>HET Density</b>        | <b>AUC</b>   | <b>95%CI</b> | <b>SE</b> |                 |
| Neuroradiology Fellow     | 0.545        | 0.510-0.582  | 0.017     |                 |
| Resident                  | 0.542        | 0.505-0.579  | 0.015     |                 |
| Radiology Fellow          | 0.539        | 0.502-0.575  | 0.017     |                 |
| <b>AUC comparison</b>     | <b>Δ AUC</b> | <b>95%CI</b> | <b>SE</b> | <b>P-value*</b> |
| Neuro Fellow ~ Resident   | 0.003        | -0.022-0.028 | 0.013     | 0.814           |
| Resident ~ Rad Fellow     | 0.003        | -0.022-0.029 | 0.013     | 0.789           |
| Neuro Fellow ~ Rad Fellow | 0.007        | -0.01-0.023  | 0.008     | 0.437           |

  

|                       |            |              |           |  |
|-----------------------|------------|--------------|-----------|--|
| <b>Swirl Sign</b>     | <b>AUC</b> | <b>95%CI</b> | <b>SE</b> |  |
| Neuroradiology Fellow | 0.562      | 0.525-0.598  | 0.017     |  |

|                           |              |              |           |                 |
|---------------------------|--------------|--------------|-----------|-----------------|
| Resident                  | 0.556        | 0.519-0.592  | 0.018     |                 |
| Radiology Fellow          | 0.535        | 0.498-0.572  | 0.017     |                 |
| <b>AUC comparison</b>     | <b>Δ AUC</b> | <b>95%CI</b> | <b>SE</b> | <b>P-value*</b> |
| Neuro Fellow ~ Resident   | 0.006        | -0.004-0.017 | 0.005     | 0.254           |
| Resident ~ Rad Fellow     | 0.021        | -0.021-0.063 | 0.022     | 0.332           |
| Neuro Fellow ~ Rad Fellow | 0.027        | 0.014-0.068  | 0.021     | 0.194           |

---

|                           |              |              |           |                 |
|---------------------------|--------------|--------------|-----------|-----------------|
| <b>Black Hole Sign</b>    | <b>AUC</b>   | <b>95%CI</b> | <b>SE</b> |                 |
| Neuroradiology Fellow     | 0.527        | 0.490-0.563  | 0.017     |                 |
| Resident                  | 0.512        | 0.476-0.549  | 0.011     |                 |
| Radiology Fellow          | 0.503        | 0.466-0.540  | 0.001     |                 |
| <b>AUC comparison</b>     | <b>Δ AUC</b> | <b>95%CI</b> | <b>SE</b> | <b>P-value*</b> |
| Neuro Fellow ~ Resident   | 0.011        | -0.002-0.023 | 0.006     | 0.095           |
| Resident ~ Rad Fellow     | 0.013        | -0.019-0.045 | 0.017     | 0.431           |
| Neuro Fellow ~ Rad Fellow | 0.024        | -0.009-0.057 | 0.017     | 0.162           |

---

|                           |              |              |           |                 |
|---------------------------|--------------|--------------|-----------|-----------------|
| <b>Blend Sign</b>         | <b>AUC</b>   | <b>95%CI</b> | <b>SE</b> |                 |
| Neuroradiology Fellow     | 0.513        | 0.463-0.562  | 0.026     |                 |
| Resident                  | 0.511        | 0.460-0.564  | 0.026     |                 |
| Radiology Fellow          | 0.502        | 0.451-0.554  | 0.026     |                 |
| <b>AUC comparison</b>     | <b>Δ AUC</b> | <b>95%CI</b> | <b>SE</b> | <b>P-value*</b> |
| Neuro Fellow ~ Resident   | 0.002        | -0.017-0.021 | 0.010     | 0.815           |
| Resident ~ Rad Fellow     | 0.009        | -0.014-0.031 | 0.012     | 0.452           |
| Neuro Fellow ~ Rad Fellow | 0.011        | -0.011-0.033 | 0.011     | 0.323           |

---

|                           |              |              |           |                 |
|---------------------------|--------------|--------------|-----------|-----------------|
| <b>Fluid Sign</b>         | <b>AUC</b>   | <b>95%CI</b> | <b>SE</b> |                 |
| Neuroradiology Fellow     | 0.505        | 0.468-0.542  | 0.012     |                 |
| Resident                  | 0.516        | 0.479-0.553  | 0.011     |                 |
| Radiology Fellow          | 0.505        | 0.469-0.542  | 0.007     |                 |
| <b>AUC comparison</b>     | <b>Δ AUC</b> | <b>95%CI</b> | <b>SE</b> | <b>P-value*</b> |
| Neuro Fellow ~ Resident   | 0.001        | -0.004-0.007 | 0.003     | 0.5817          |
| Resident ~ Rad Fellow     | 0.003        | -0.002-0.008 | 0.003     | 0.263           |
| Neuro Fellow ~ Rad Fellow | 0.004        | 0.000-0.009  | 0.002     | 0.040           |

---

|                           |              |              |           |                 |
|---------------------------|--------------|--------------|-----------|-----------------|
| <b>Hypodensities</b>      | <b>AUC</b>   | <b>95%CI</b> | <b>SE</b> |                 |
| Neuroradiology Fellow     | 0.565        | 0.528-0.608  | 0.019     |                 |
| Resident                  | 0.572        | 0.535-0.608  | 0.019     |                 |
| Radiology Fellow          | 0.561        | 0.524-0.597  | 0.019     |                 |
| <b>AUC comparison</b>     | <b>Δ AUC</b> | <b>95%CI</b> | <b>SE</b> | <b>P-value*</b> |
| Neuro Fellow ~ Resident   | 0.001        | -0.014-0.028 | 0.011     | 0.505           |
| Resident ~ Rad Fellow     | 0.011        | -0.01-0.031  | 0.010     | 0.289           |
| Neuro Fellow ~ Rad Fellow | 0.004        | -0.017-0.025 | 0.011     | 0.708           |

\* P-value of the test of DeLong et al. (1988)

*Legend:* Receiver operating characteristic curves for Noncontrast Computed Tomography Markers (NCCT) in the prediction of revised hematoma expansion (above row) and pairwise comparison of ROC analysis (below row) with difference in area under the curve ( $\Delta$  AUC) across two Resident s and one neuroradiology fellow with extensive stroke imaging experience. AUC indicates area under the curve; 95% CI, confidence interval; HET density, heterogeneous density; IRR shape, irregular shape; Neuro Fellow, neuroradiology fellow; Rad Fellow, radiology fellow; SE, standard error.
